# Supplementary material for: Finding the sweet spot: a library of hydrogels with tunable degradation for tissue model development
Source: Royal Society of Chemistry journal article supplement (doi:10.1039/d1tb02436a), 2022-01-01
Supplement: d1tb02436a1.pdf [file d1tb02436a1.pdf]

## SUPPLEMENTARY INFORMATION

### **Finding the sweet spot: a library of hydrogels with tunable degradation for tissue model development**

Narendra Pandala<sup>1</sup>, Michael A. LaScola<sup>1</sup>, Zachary Hinton<sup>2,3</sup>, LaShanda T.J. Korley<sup>2,3</sup>, Erin Lavik<sup>1</sup>

<sup>1</sup>Department of Chemical, Biochemical and Environmental Engineering, University of Maryland Baltimore County, Baltimore, MD, Piscataway Territories, USA.

<sup>2</sup>Department of Materials Science and Engineering, University of Delaware, Newark, Delaware 19716, United States

<sup>3</sup>Department of Chemical and Biomolecular Engineering, University of Delaware, Newark, Delaware 19716, United States

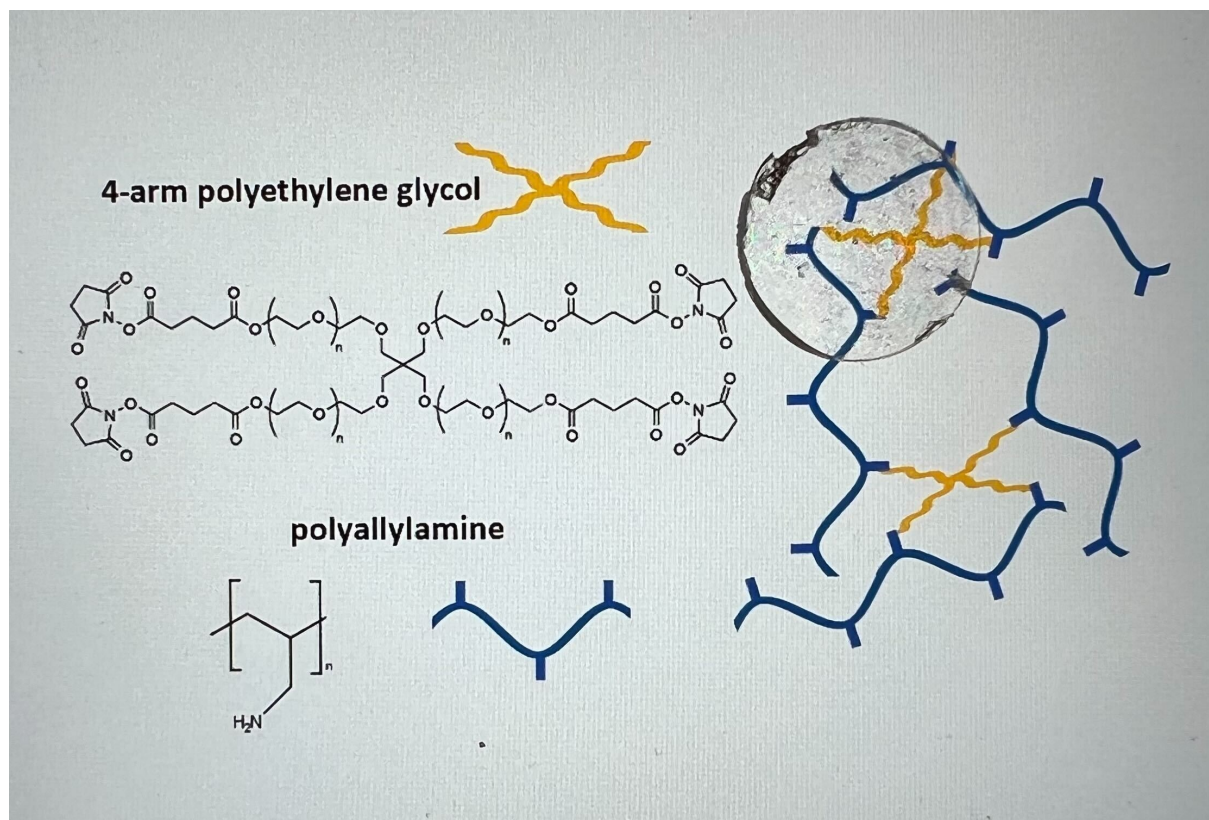

Figure S1. Images of Hydrogel prepared using 10:1 ratio of free amines to succinimides in the PEG-PAA library

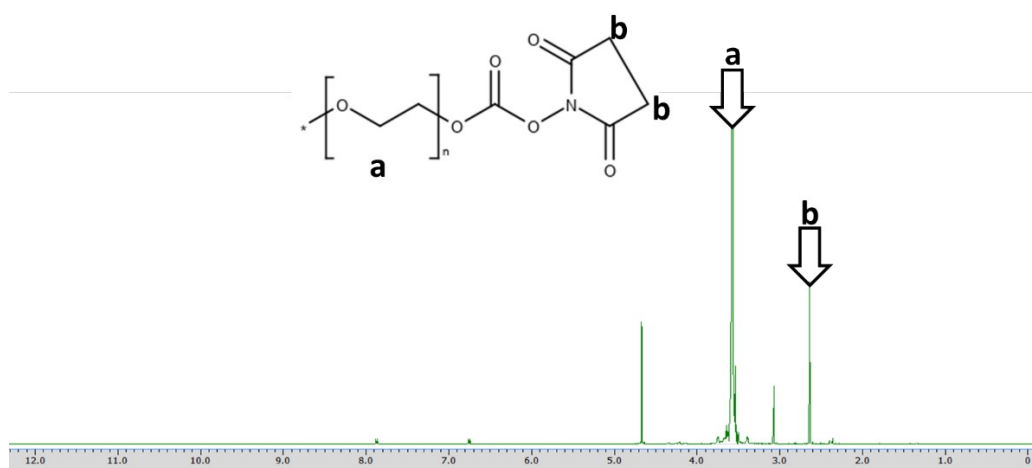

Figure S2.  $^1\text{H}$  NMR spectrum of the bifunctional PEG-SG (4.6kDa)

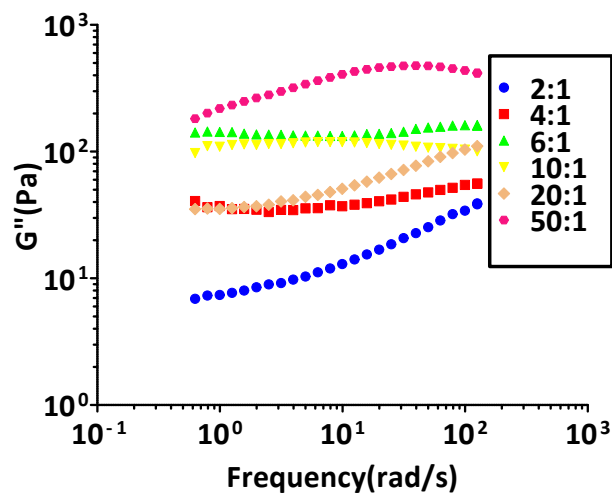

Figure S3. Frequency dependent loss modulus ( $G''$ ) of PEG-PAA hydrogels with varied ratios of free amines to succinimidyl groups.

Using the relationship between the frequency-independent elastic modulus and the effective crosslinking density (or network junction density) (as presented in Calveat et al.)<sup>1</sup> based on Flory's theory of rubber elasticity:

$$n_e = \frac{G'}{\left(1 - \frac{2}{f}\right)\left(\frac{f}{2}\right)RT} \quad (1)$$

where  $f$  is the number of strands linked to a cross linker. For our calculations, the number is close to 3. (The core of the 4 arm PEG has 4 strands attached, and the junction between an arm and polylysine has three arms. Therefore, there is one 4 arm junction for every 4, 3-armed junctions assuming complete reactivity making  $f$  equal to 3.2 but it is very unlikely that all the arms reacted. Assuming a 75% coupling rate, then  $f$  becomes 3.25.) Using  $f=3.25$  and  $T=298$  K along with the value for the gas constant,  $R$  ( $8.314 \text{ Pa}\cdot\text{m}^3\cdot\text{K}^{-1}\cdot\text{mol}^{-1}$ ), we find that the effective crosslinking density can be seen in the table, below.

Supplementary Table 1:  $n_e$  and  $M_e$  based on the Elastic Modulus Results

| Ratio Amines:SG | $G'$ (Pa) | $f$  | $n_e$ (mol/m <sup>3</sup> ) | $M_e$ (kg/mol) | $M_e$ (g/mol) |
|-----------------|-----------|------|-----------------------------|----------------|---------------|
| 2               | 593       | 3.25 | 0.38                        | 261.10         | 261096.08     |
| 4               | 3001      | 3.25 | 1.94                        | 51.60          | 51603.35      |
| 6               | 6169      | 3.25 | 3.98                        | 25.10          | 25102.37      |
| 10              | 5165      | 3.25 | 3.34                        | 29.98          | 29977.46      |
| 20              | 3895      | 3.25 | 2.52                        | 39.75          | 39752.59      |
| 50              | 2555      | 3.25 | 1.65                        | 60.61          | 60605.02      |

The effective molecular weight between cross links,  $M_e$ , is defined by the polymer concentration in kg/m<sup>3</sup> divided by  $n_e$ . This assumes the simplest model for crosslinking based on rubber elasticity which is a reasonable approximation since  $G'' \ll G'$ .

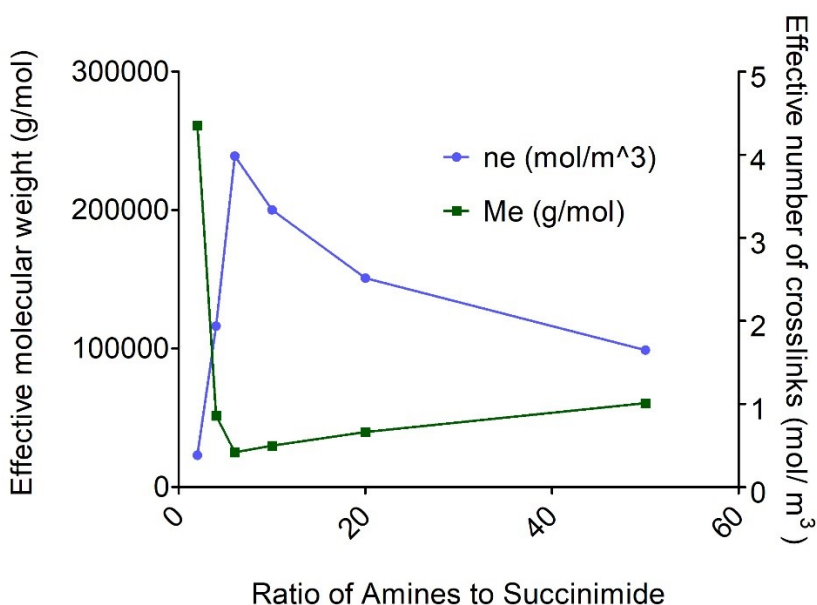

Figure S4. Effective molecular weight and effective number of crosslinks of the PEG-PAA system, this was obtained using the relationship between  $G'$  and the network junction density based on Flory's theory of rubber elasticity.

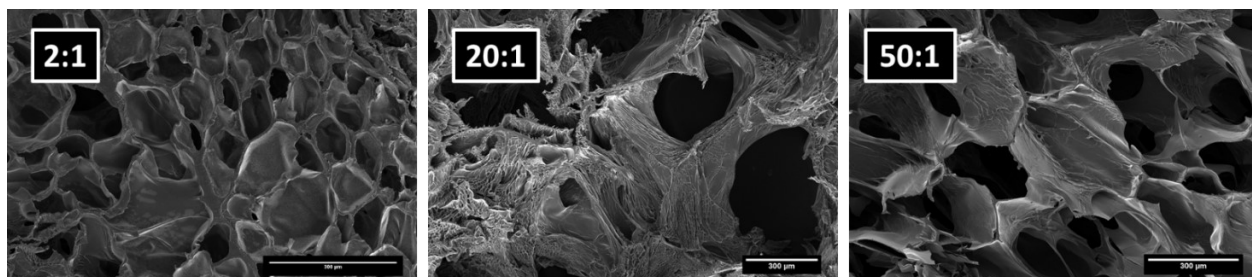

Figure S5. SEM images of the PEG-PAA formed using 2:1, 20:1 and 50:1 ratio of free amines in PAA to succinimidyl groups in PEG-SG showing a larger pore size compared to the other ratios. (Scale bar is 300  $\mu\text{m}$ )

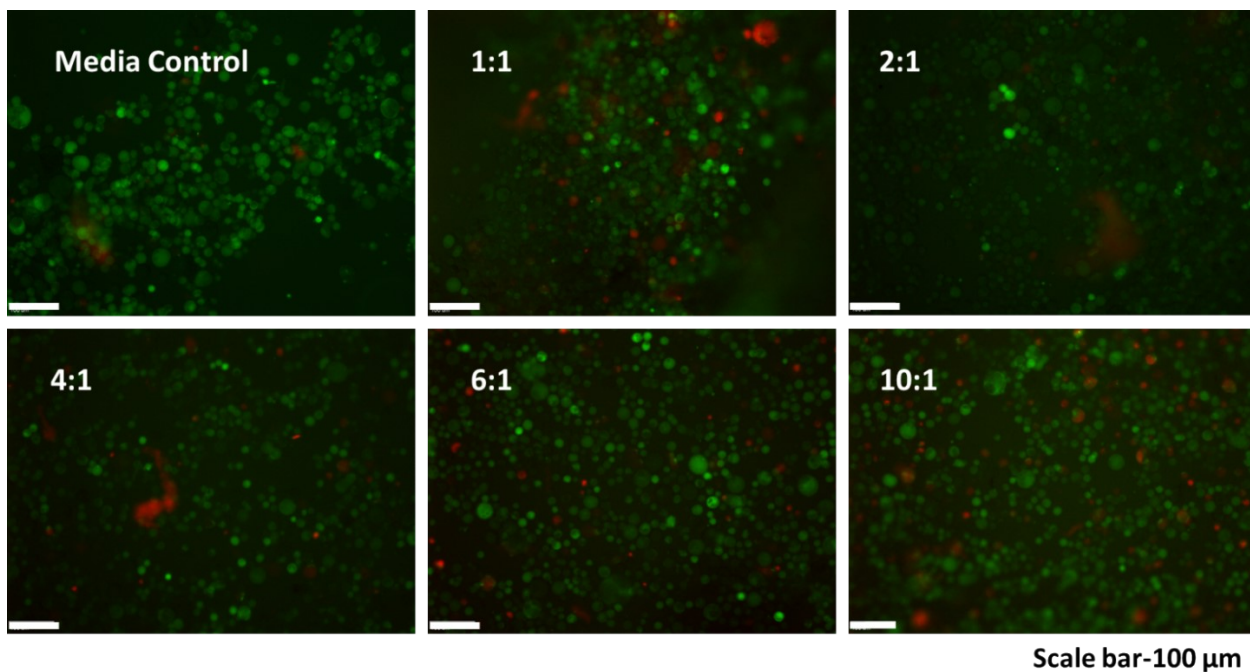

Scale bar-100  $\mu\text{m}$

Figure S6. Figure 3. Live/ Dead scans of Caco-2 cells seeded on top of the PEG-PAA hydrogel library (Scale bar is 100  $\mu\text{m}$ )

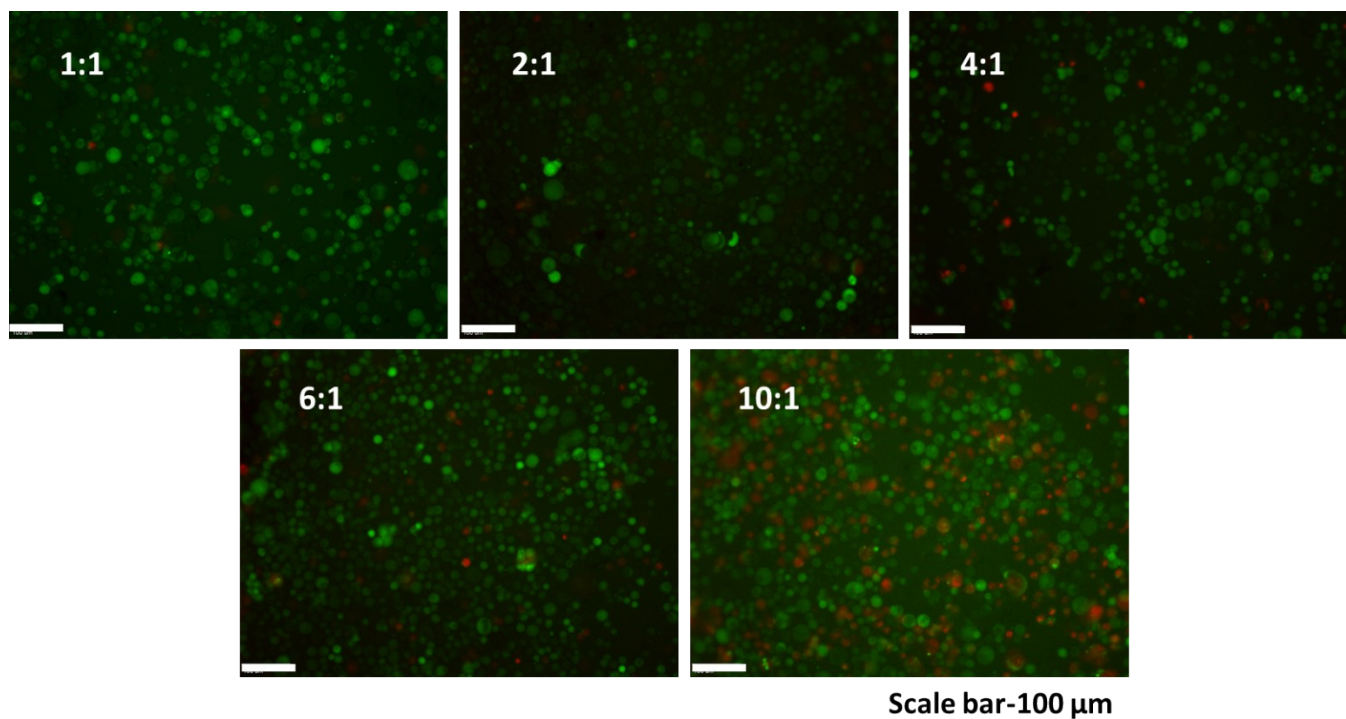

Figure S7. Live/ Dead scans Caco-2 cells seeded on top of the PEG-PAA hydrogel library supplemented with laminin, 1% Laminin is added to the PAA precursor solution and incubated at 37°C for an hour (Scale bar is 100 μm)

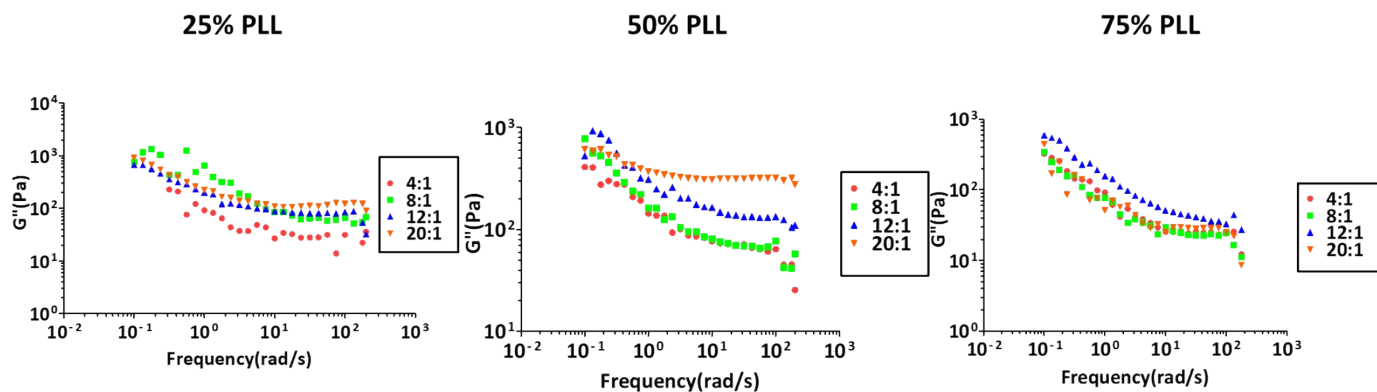

Figure S8. Frequency dependent loss modulus ( $G''$ ) of PEG-PAA-PLL hydrogels with varied ratios of free amines to succinimidyl groups

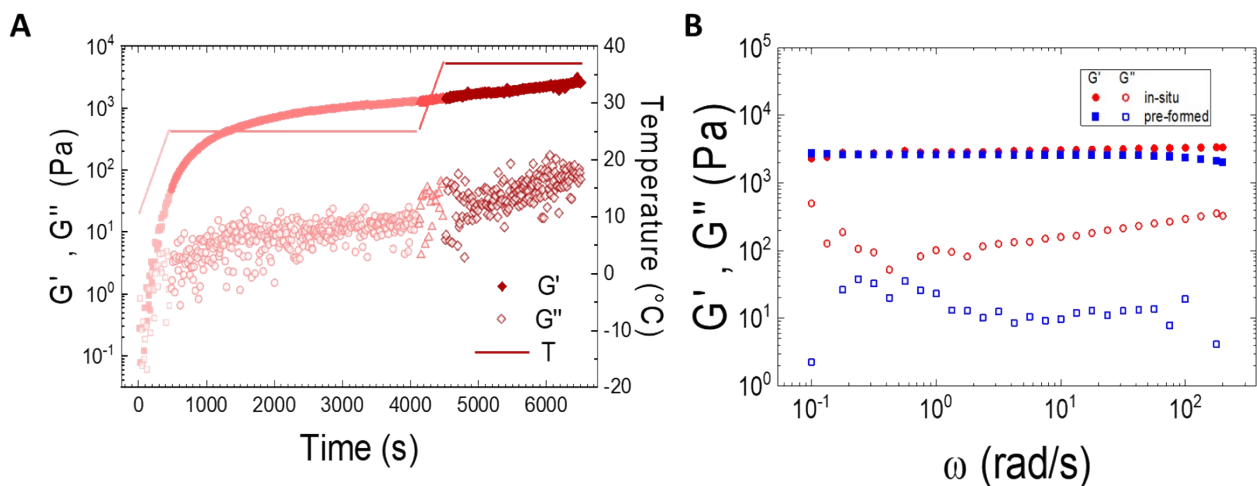

Figure S9. A) Moduli measured during in-situ gelation of 25% PLL 4:1. B) Frequency sweep results for the same gel formed in-situ and pre-formed.

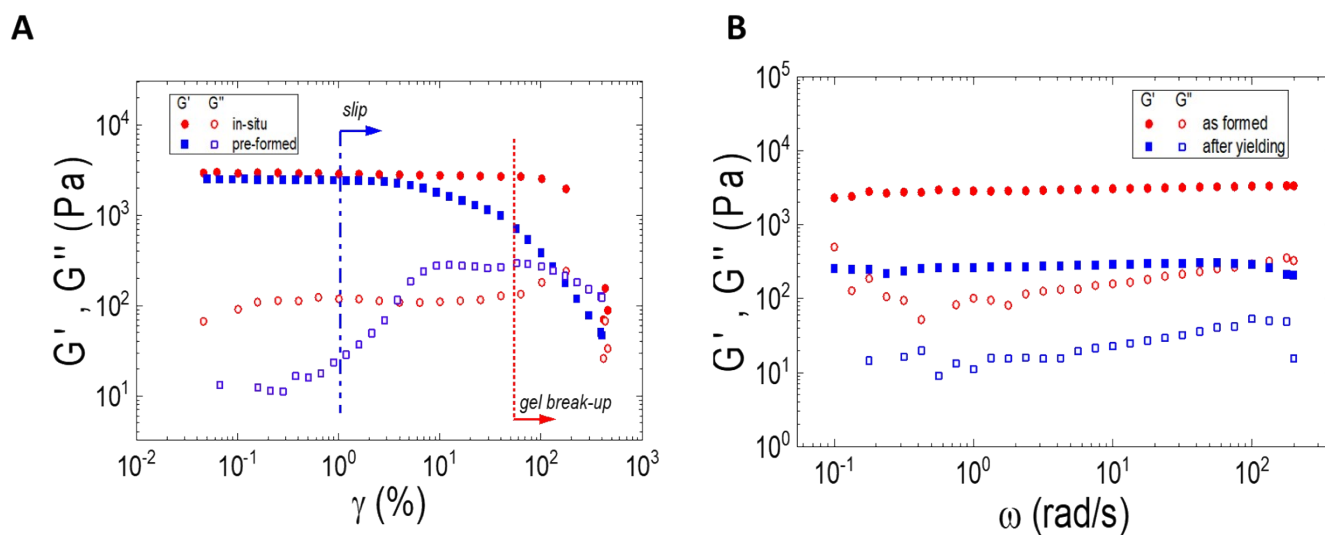

Figure S10. A) Comparison of strain sweep results between 25% PLL 4:1 gelled in-situ and pre-formed. Note the onset of slip in the pre-formed gel and true non-linear deformation and break-up in the in-situ gel. B) Frequency sweeps of the in-situ formed gel before and after performing the strain sweep, showing considerable damage due to break-up.

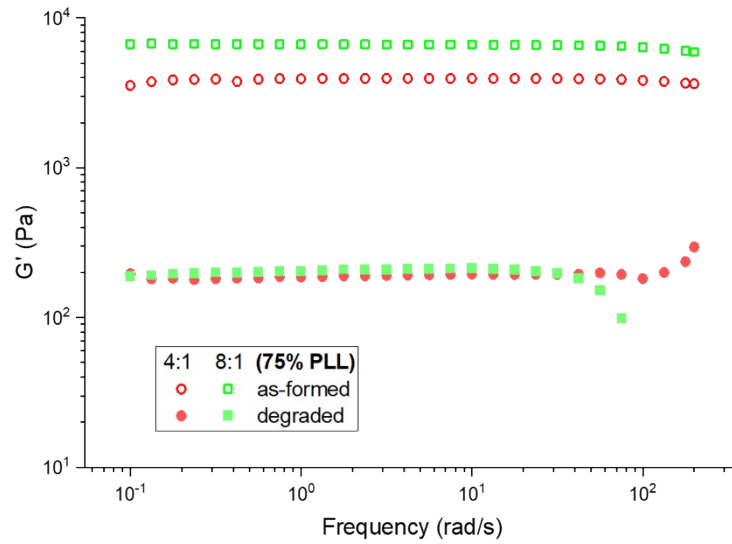

Figure S11. Storage moduli as a function of frequency for as-formed (hollow symbols) and degraded gels (filled symbols) for 4:1 and 8:1, with 75% PLL.

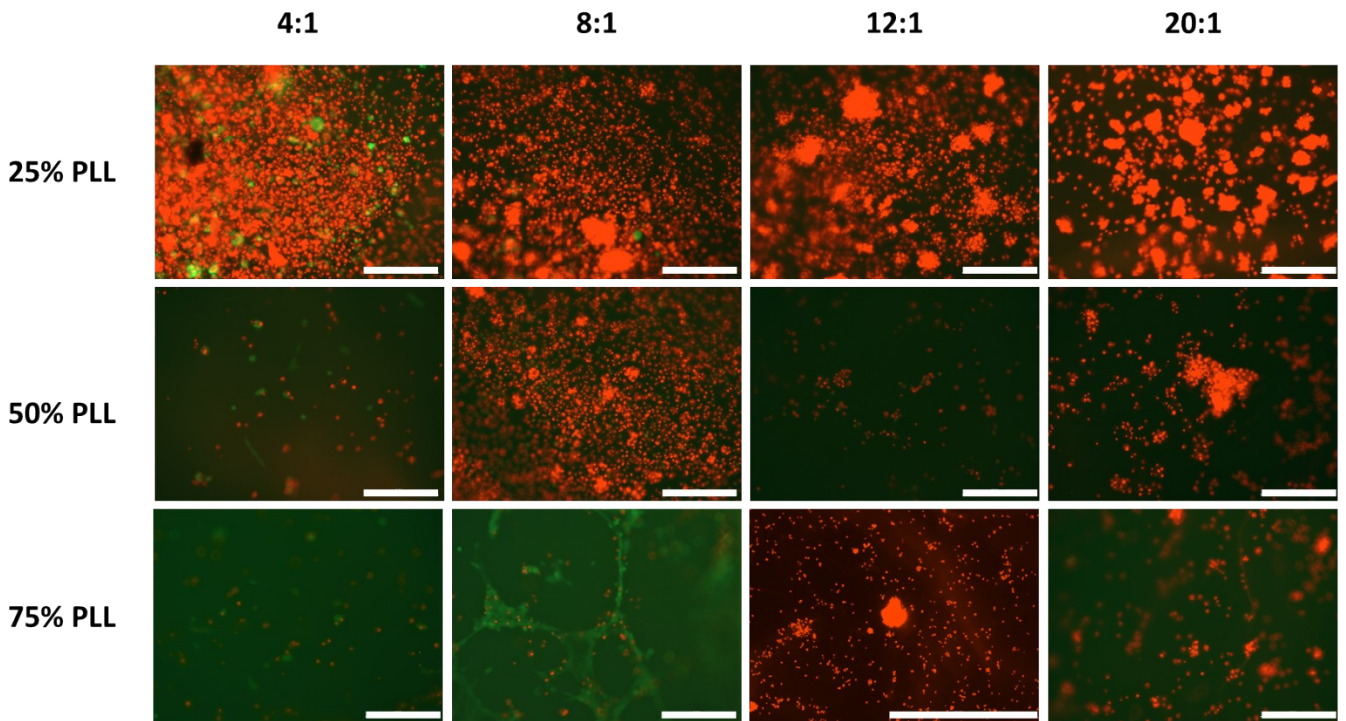

Figure S12. Live/ Dead scans of rat endothelial cells seeded on top of the PEG-PAA-PLL hydrogel library at day-4 (Scale bar is 200  $\mu\text{m}$ , except for the 12:1, 75%PLL gel which has a scale bar of 1000  $\mu\text{m}$ )



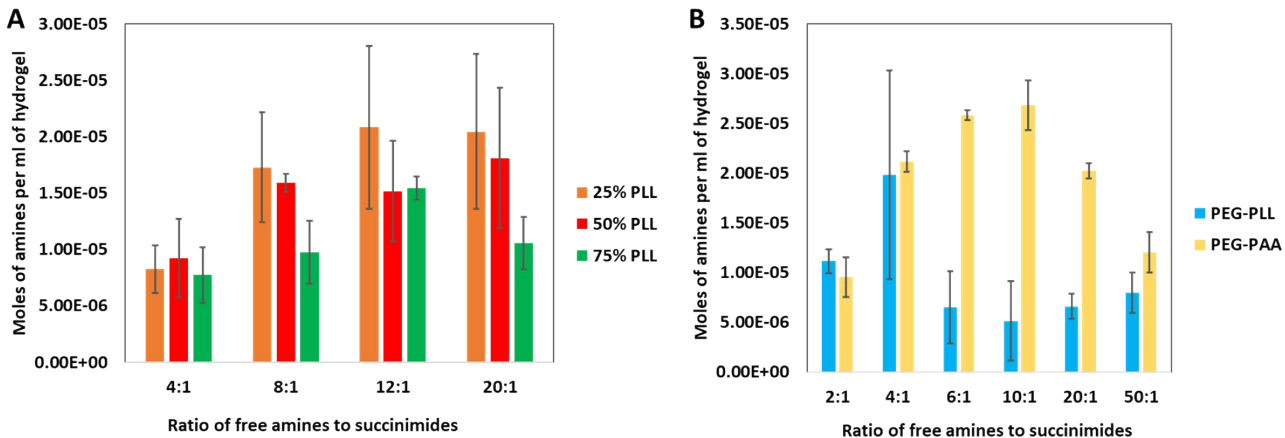

Figure S13. Comparison of the number of moles of amines per ml of the hydrogel obtained by using an OPA assay on the a) PEG-PAA-PLL library and the b) PEG-PAA and PEG-PLL hydrogel libraries.
